# Supplementary material
Source: PubMed Central journal article supplement (PMC8634154)
Supplement: jama-e2120929-s003.pdf [file jama-e2120929-s003.pdf]

## Data Sharing Statement

Vallentin. Effect of Intravenous or Intraosseous Calcium vs Saline on Return of Spontaneous Circulation in Adults With Out-of-Hospital Cardiac Arrest. *JAMA*. Published November 30, 2021. doi:10.1001/jama.2021.20929

### Data

**Data available:** Yes

**Data types:** Deidentified participant data, Data dictionary

**How to access data:** Contact to Lars W. Andersen ([lwandersen@clin.au.dk](mailto:lwandersen@clin.au.dk)). Details are provided in the protocol.

**When available:** Six months after the publication of the last results

### Supporting Documents

**Document types:** None

### Additional Information

**Who can access the data:** Approved projects. See protocol for details.

**Types of analyses:** Any purpose.

**Mechanisms of data availability:** After approval.
